# Supplementary material for: Gene and miRNA expression signature of Lewis lung carcinoma LLC1 cells in extracellular matrix enriched microenvironment
Source: PubMed Central journal article supplement (PMC5057255; doi:10.1186/s12885-016-2825-9), 2016-10-11
Supplement: 12885_2016_2825_MOESM1_ESM.pdf [file 12885_2016_2825_MOESM1_ESM.pdf]

**Additional file 1.** List of primer sequences.

List of primer sequences used for gene qPCR

| <b>Gene</b> | <b>Forward sequence</b> | <b>Reverse sequence</b>  |
|-------------|-------------------------|--------------------------|
| Hnf4a       | CACGCGGAGGTCAAGCTAC     | CCCAGAGATGGGAGAGGTGAT    |
| Ifnb1       | CCGAGCAGAGATCTTCAGGAA   | CCTGCAACCACCACTCATTCT    |
| Klf8        | TCAGAAAGTGGTTCGATGCAG   | AACAGAGCTGGGTTCTCCATT    |
| Fgfr4       | GCTCGGAGGTAGAGGTCTTGT   | CCACGCTGACTGGTAGGAA      |
| Hprt1       | CCTAAGATGAGCGCAAGTTGAA  | CCACAGGACTAGAACACCTGCTAA |

List of primer sequences used for miRNA cDNA synthesis

| <b>miRNAs</b> | <b>Stem-loop sequence</b>                          |
|---------------|----------------------------------------------------|
| Mir-207       | GTCGTATCCAGTGCAGGGTCCGAGGTATTCGCACTGGATACGACGAGGGA |
| miR-376c-3p   | GTCGTATCCAGTGCAGGGTCCGAGGTATTCGCACTGGATACGACACGTGA |
| miR-466f-3p   | GTCGTATCCAGTGCAGGGTCCGAGGTATTCGCACTGGATACGACGTGTGT |
| miR-195a-5p   | GTCGTATCCAGTGCAGGGTCCGAGGTATTCGCACTGGATACGACGCCAAT |
| Sno135        | GTCGTATCCAGTGCAGGGTCCGAGGTATTCGCACTGGATACGACCTTCAG |

List of primer sequences used for miRNA qPCR

| <b>miRNAs</b> | <b>Forward sequence</b> | <b>Reverse sequence</b> |
|---------------|-------------------------|-------------------------|
| Mir-207       | CGGCTTCTCCTGGCTCTCC     | CAGTGCAGGGTCCGAGGT      |
| miR-376c-3p   | CGGCGAACATAGAGGAAATT    | CAGTGCAGGGTCCGAGGT      |
| miR-466f-3p   | GGCGCATACACACACACAT     | CAGTGCAGGGTCCGAGGT      |
| miR-195a-5p   | GGCGTAGGTAGTTTCATGTT    | CAGTGCAGGGTCCGAGGT      |
| Sno135        | CGGTGGTGAGCCTATGGTTTT   | CAGTGCAGGGTCCGAGGT      |
