# Supplementary material for: Gene and miRNA expression signature of Lewis lung carcinoma LLC1 cells in extracellular matrix enriched microenvironment
Source: PubMed Central journal article supplement (PMC5057255; doi:10.1186/s12885-016-2825-9), 2016-10-11

**Additional file 8.** Hierarchical clustering analysis of upregulated (A) and downregulated (B) miRNA associated KEGG pathways.

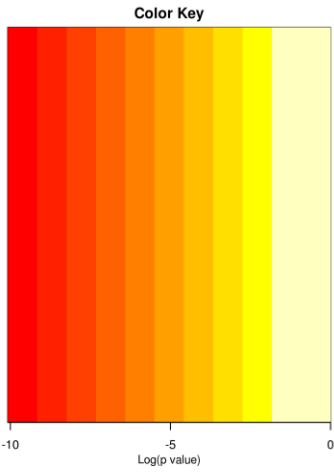

**A**

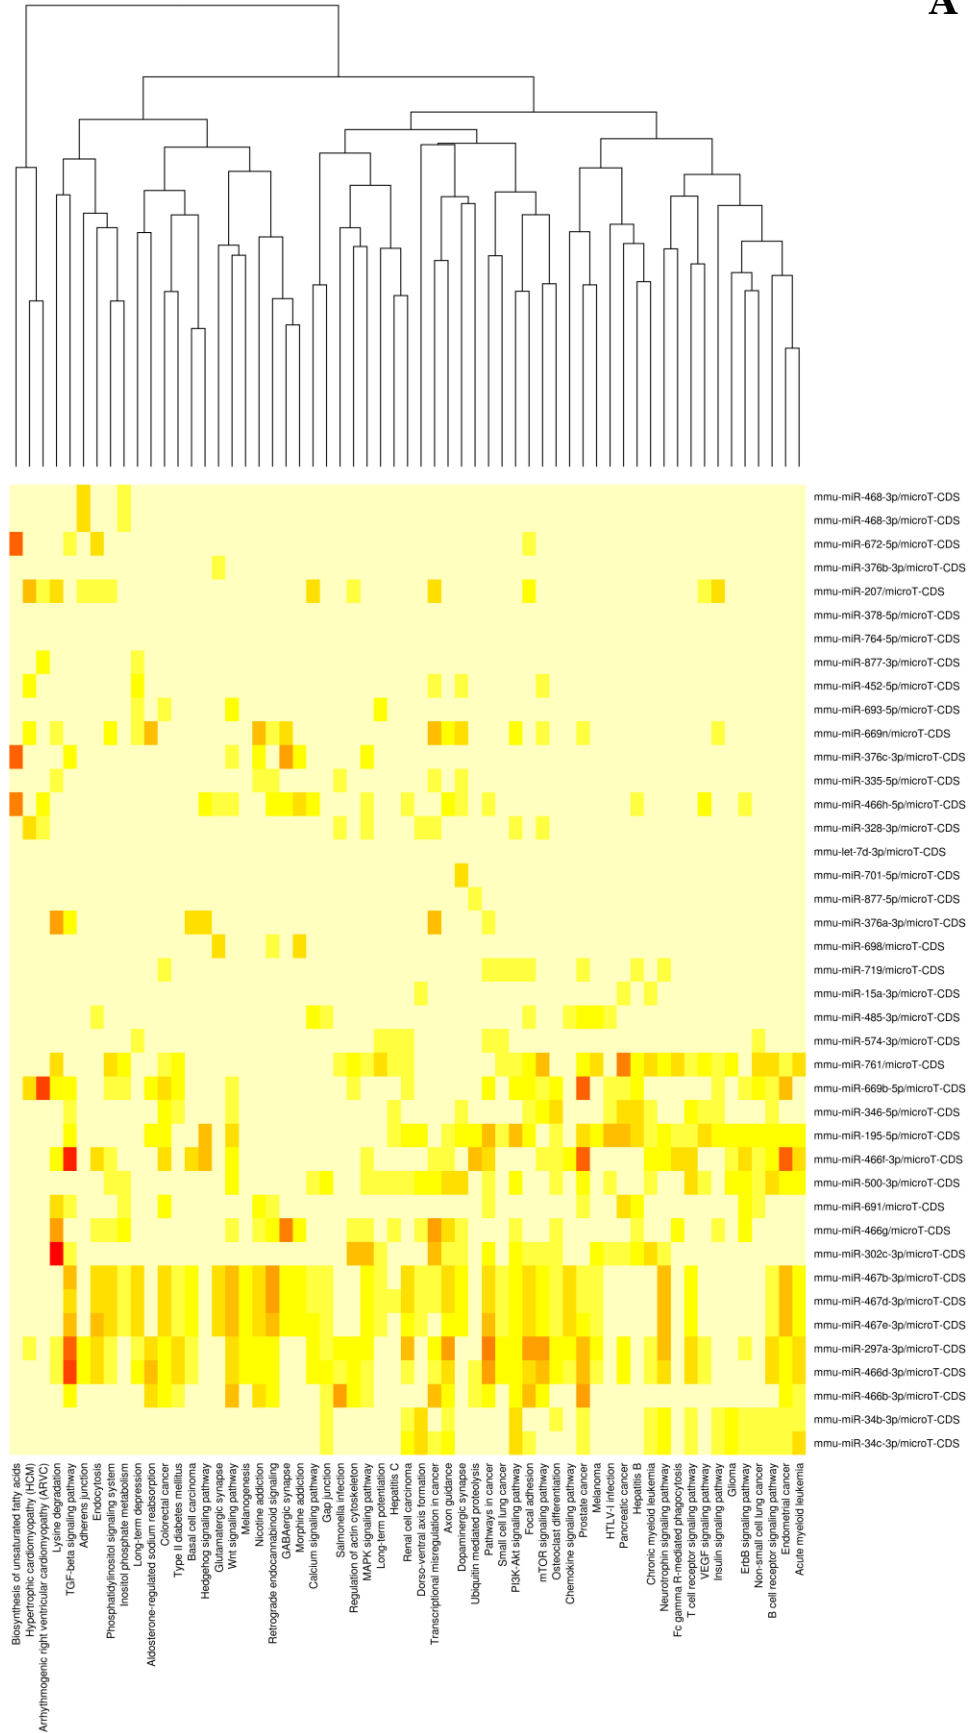

**B**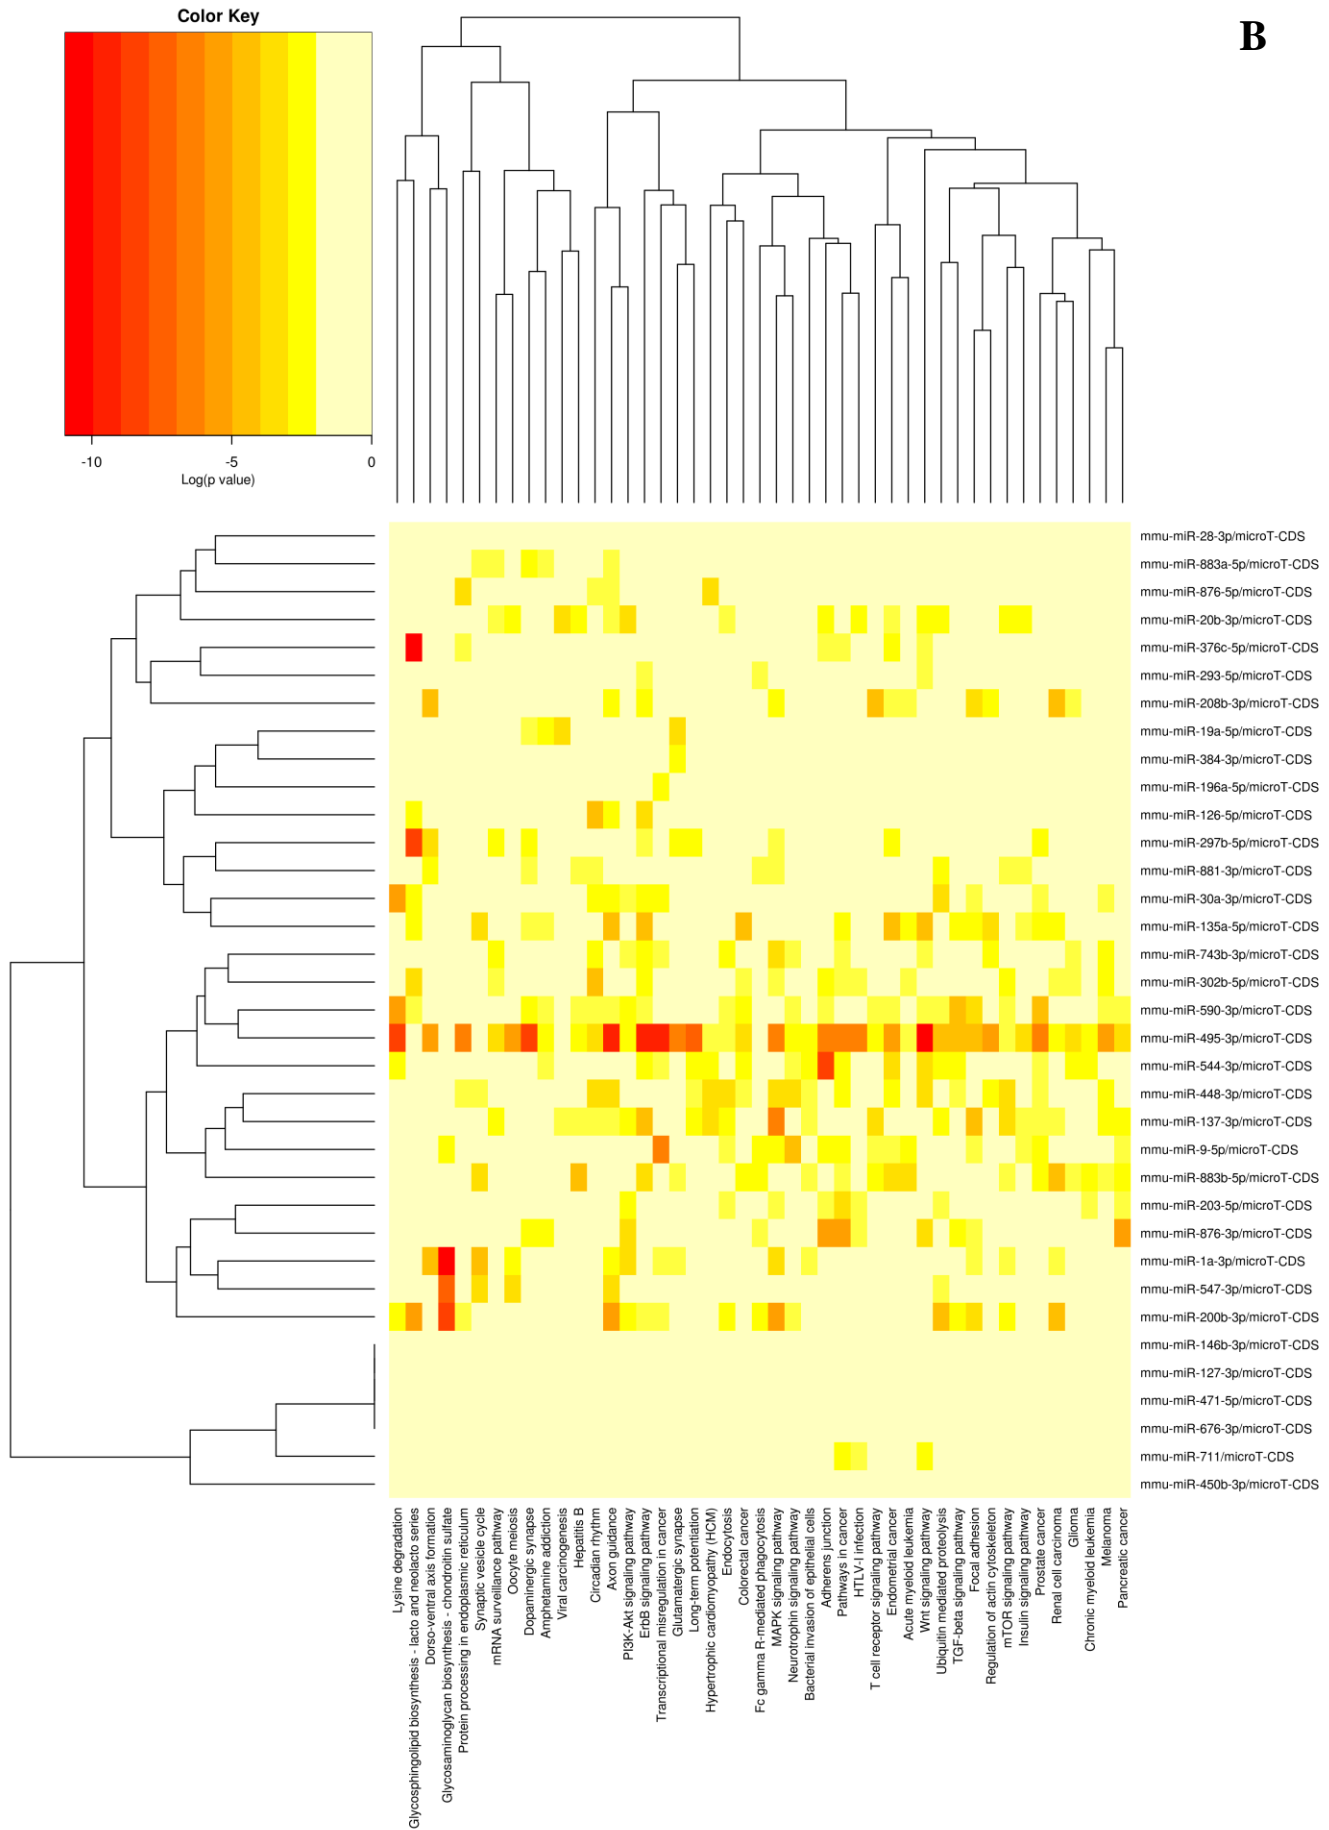

Supplement: 12885_2016_2825_MOESM8_ESM.pdf [file 12885_2016_2825_MOESM8_ESM.pdf]
